# Supplementary material for: Triple Fluorescence staining to Evaluate Mechanism-based Apoptosis following Chemotherapeutic and Targeted Anti-cancer Drugs in Live Tumor Cells
Source: PubMed Central journal article supplement (PMC6123436; doi:10.1038/s41598-018-31575-3), 2018-09-04
Supplement: 41598_2018_31575_MOESM1_ESM.pdf [file 41598_2018_31575_MOESM1_ESM.pdf]

# Triple Fluorescence staining to Evaluate Mechanism-based Apoptosis following Chemotherapeutic and Targeted Anti-cancer Drugs in Live Tumor Cells

Pradip De, Jennifer H. Carlson, Brian Leyland-Jones, Casey Williams, Nandini Dey

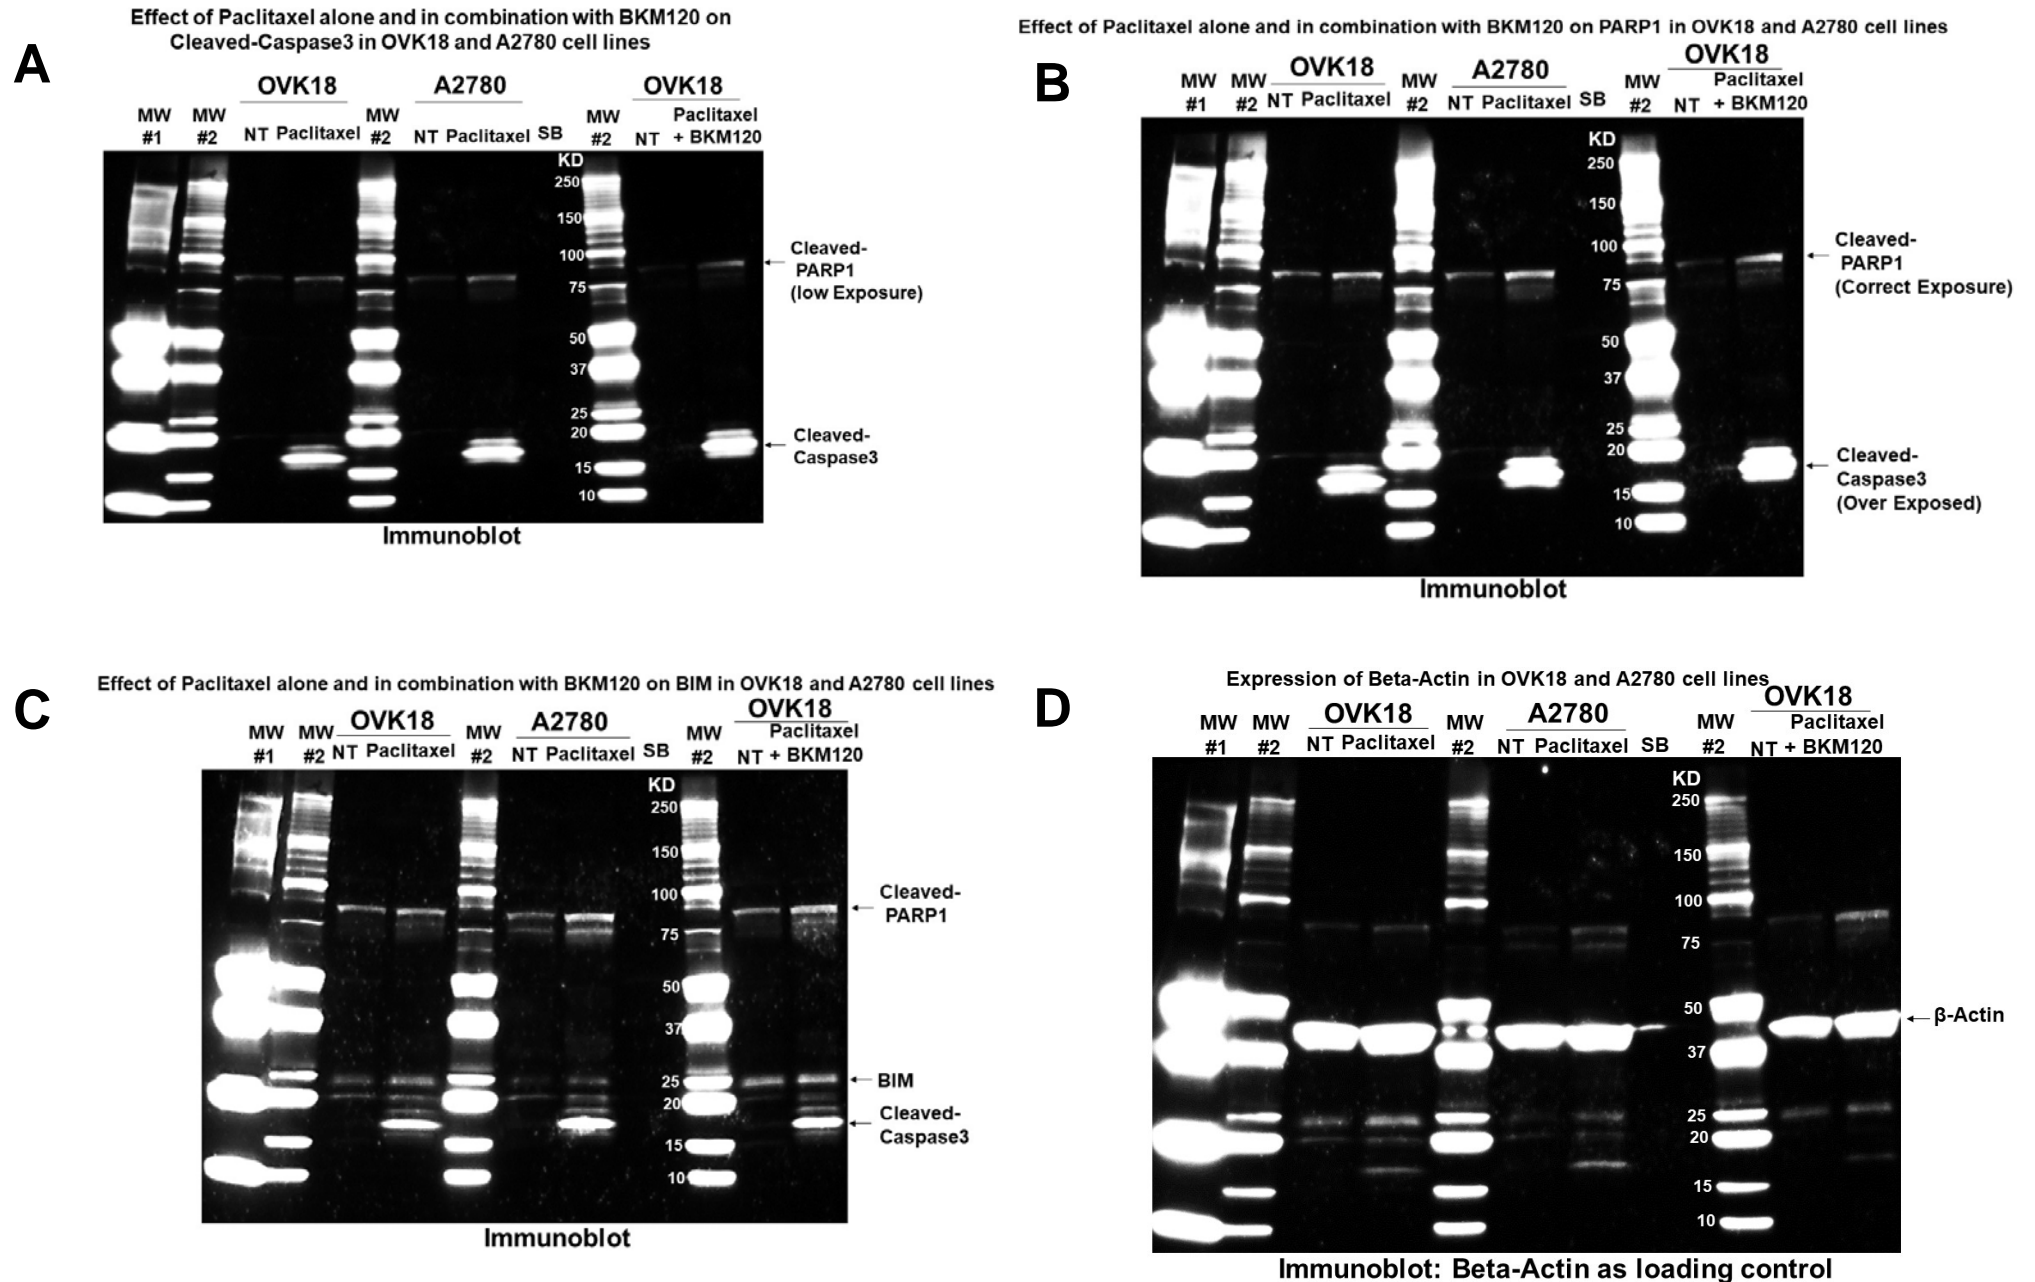

Supplementary  
Figure
